# Supplementary material for: A coordination driven self-assembled Pd6L8 nanoball catalyses copper and phosphine-free Sonogashira coupling reaction in both homogeneous and heterogeneous formats
Source: Royal Society of Chemistry journal article supplement (doi:10.1039/c5nj03658e), 2016-01-01

## Electronic Supplementary Information

© Copyright Royal Society of Chemistry.

### **A Coordination Driven Self-assembled Pd<sub>6</sub>L<sub>8</sub> Nanoball Catalyses Copper and Phosphine-free Sonogashira Coupling Reaction in both Homogeneous and Heterogeneous Formats**

Subhashis Pradhan, Subhadip Dutta and Rohith P. John\*

Department of Applied Chemistry, Indian School of Mines, Dhanbad-826 004, Jharkhand, India

#### **Table of contents**

1. Figure S1. <sup>1</sup>H-NMR of ligand **L** in DMSO-*d*<sub>6</sub>.....(p2)
2. Figure S2: <sup>13</sup>C-NMR spectrum of the ligand **L** in DMSO-*d*<sub>6</sub>.....(p2)
3. Figure S3: DEPT-135 spectrum of the compound **L** in DMSO-*d*<sub>6</sub>.....(p3)
4. Figure S4: <sup>1</sup>H- <sup>13</sup>C HSQC spectrum of the compound **L** in DMSO-*d*<sub>6</sub>.....(p3)
5. Figure S5: LCMS spectrum of the compound **L** .....(p4)
6. Figure S6: <sup>1</sup>H-NMR spectrum of **1** in DMSO-*d*<sub>6</sub>.....(p5)
7. Figure S7: <sup>1</sup>H-<sup>1</sup>H COSY spectrum of **1** in DMSO-*d*<sub>6</sub> .....(p5)
8. <sup>1</sup>H-NMR and <sup>13</sup>C-NMR spectra of the products of Sonogashira coupling.....(p6-p14)



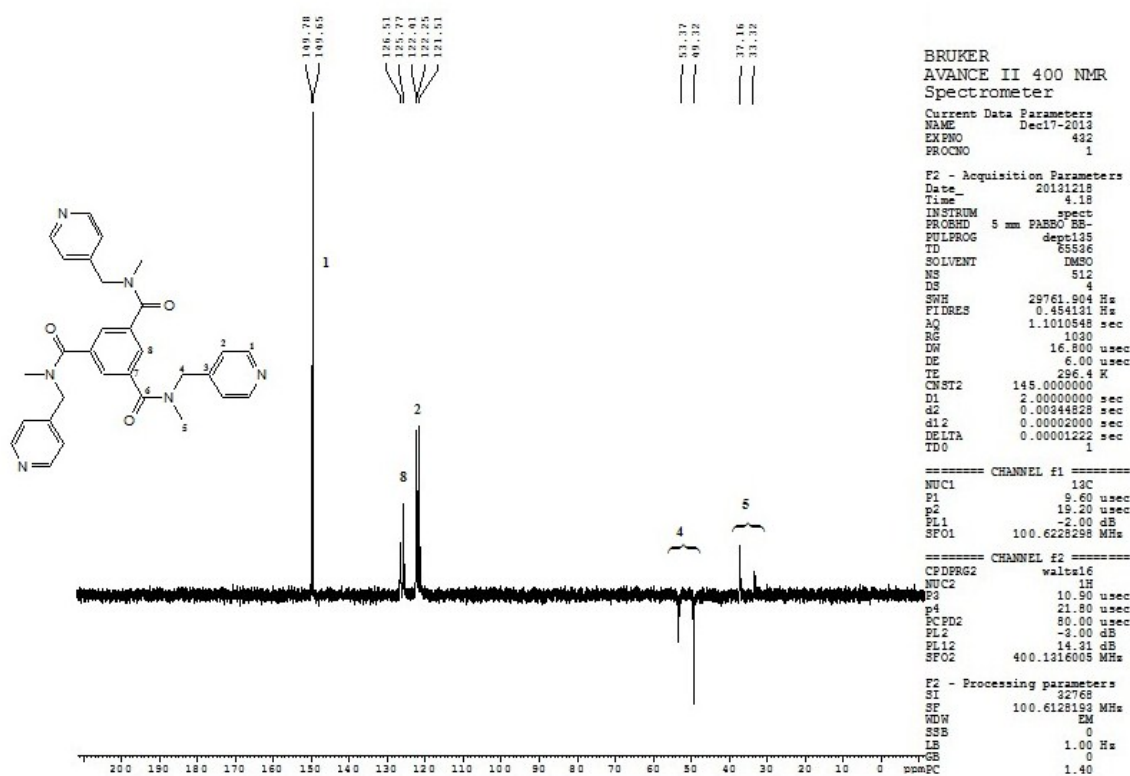

Figure S3: DEPT-135 spectrum of the compound L in DMSO-*d*<sub>6</sub>

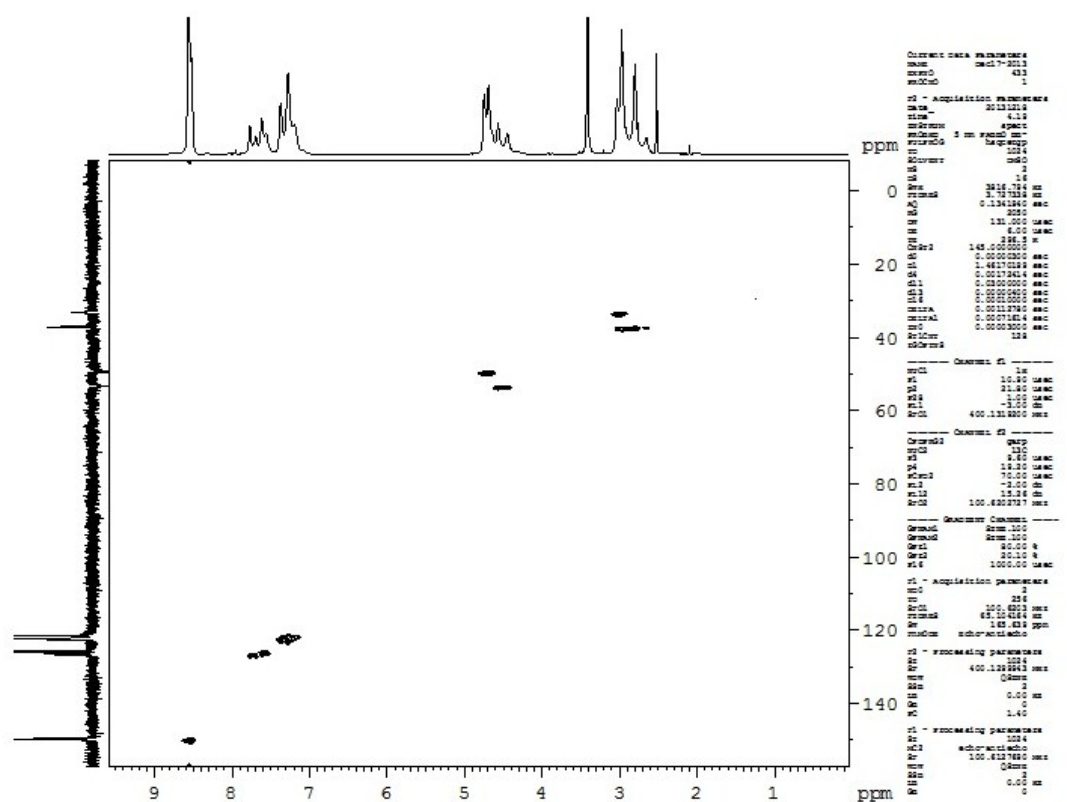

Figure S4: <sup>1</sup>H- <sup>13</sup>C HSQC spectrum of the compound L in DMSO-*d*<sub>6</sub>

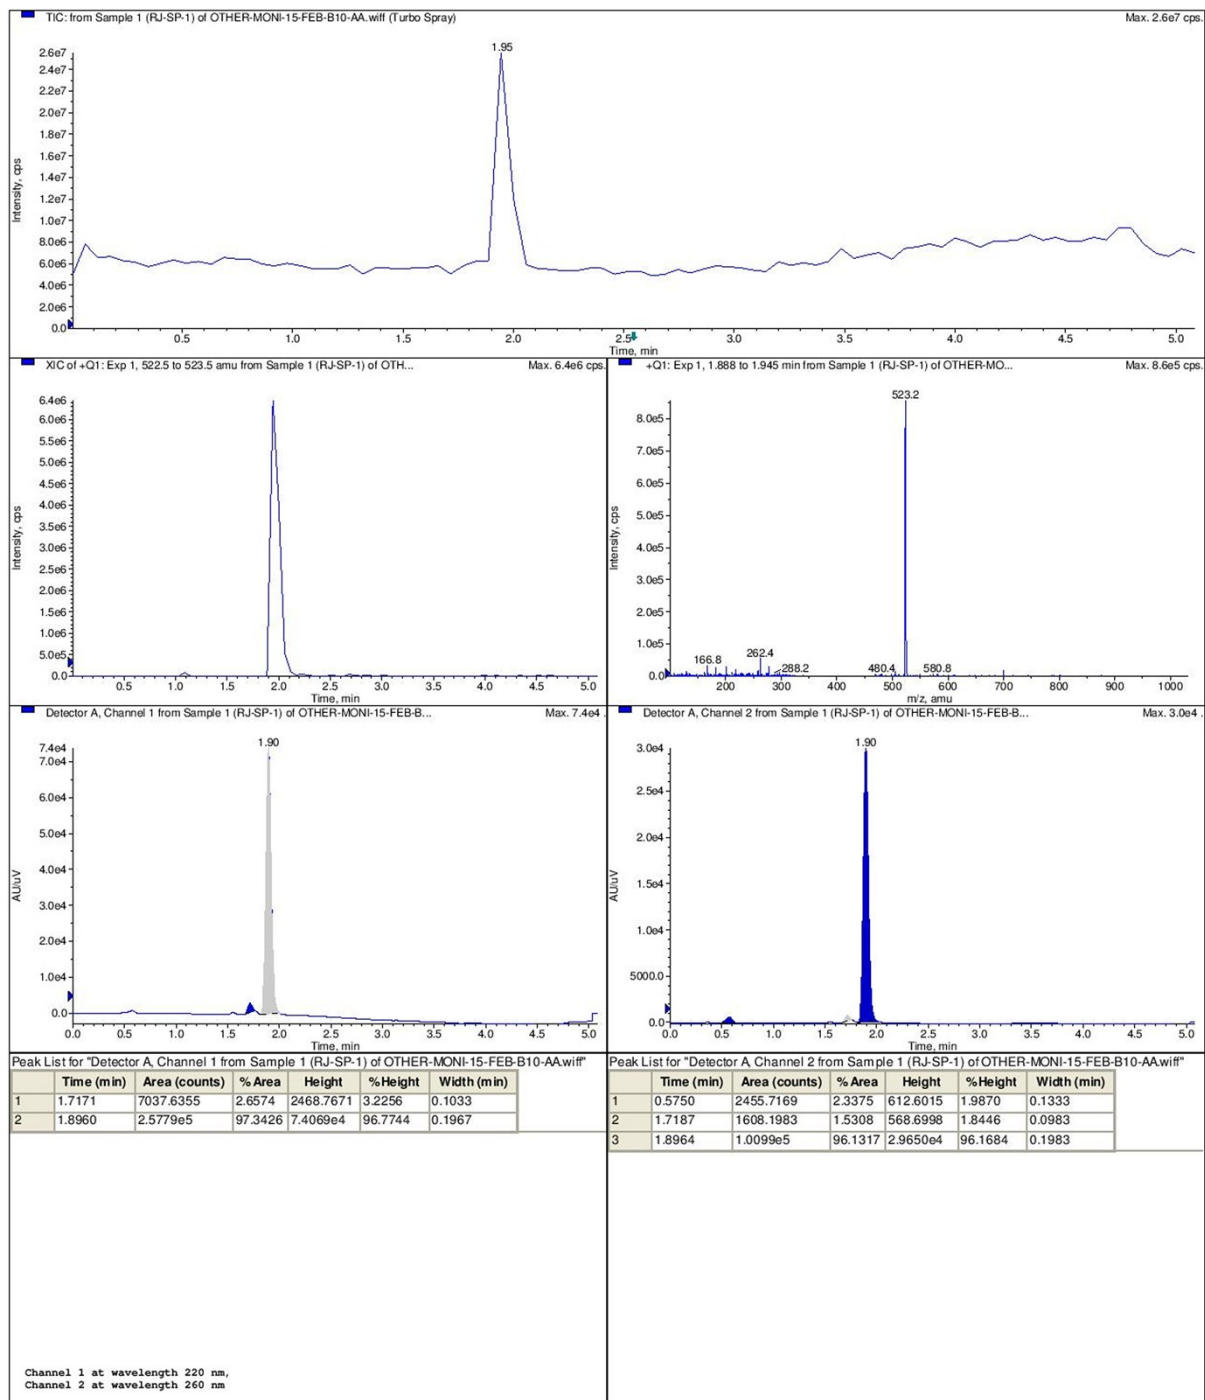

Figure S5: LCMS spectrum of the compound L

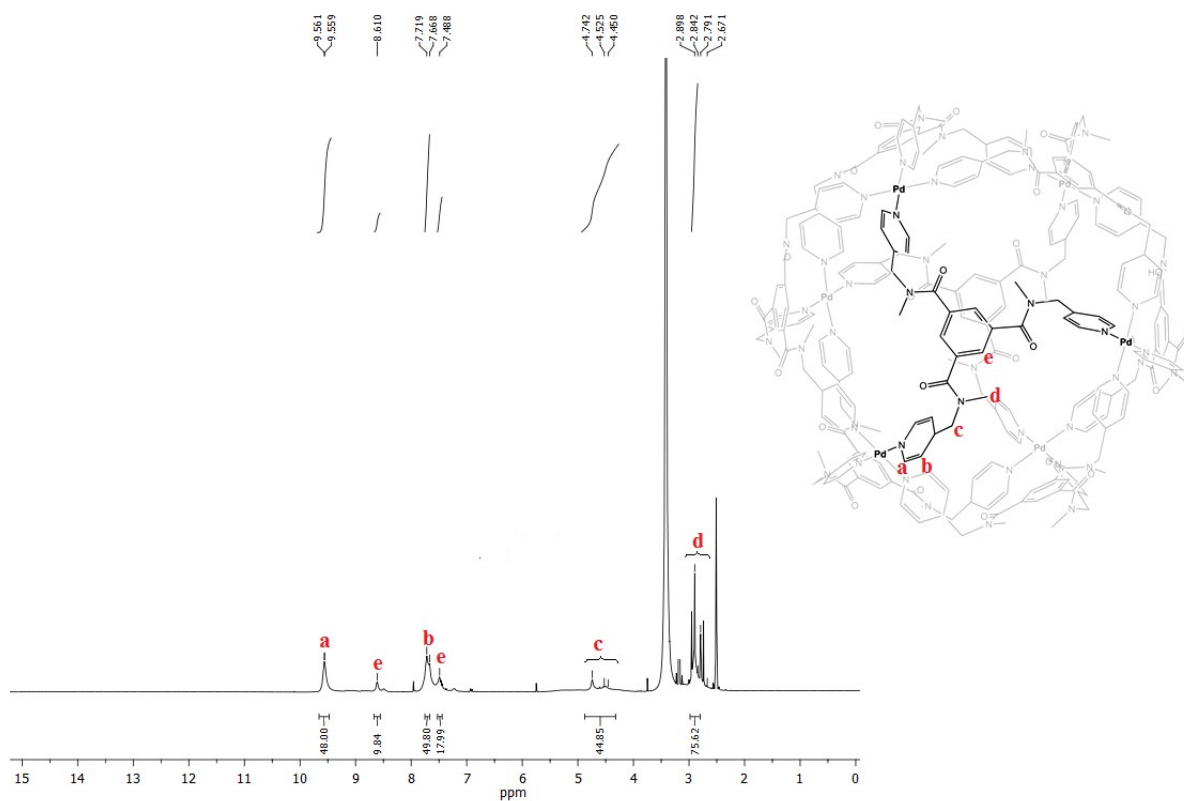

Figure S6: <sup>1</sup>H-NMR spectrum of the compound 1 in DMSO-*d*<sub>6</sub>

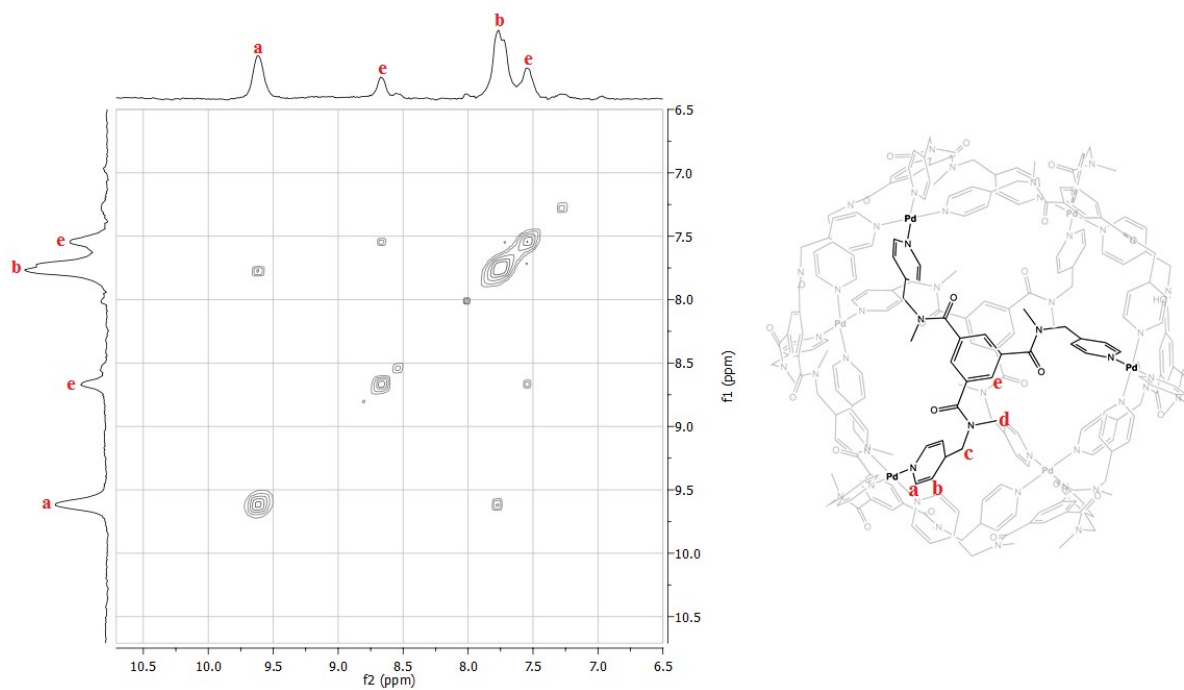

Figure S7: <sup>1</sup>H-<sup>1</sup>H COSY spectrum of the compound 1 in DMSO-*d*<sub>6</sub>

**$^1\text{H-NMR}$  and  $^{13}\text{C-NMR}$  spectra of the coupling products:**

**Table 3, Entry1, 10 and 15:**

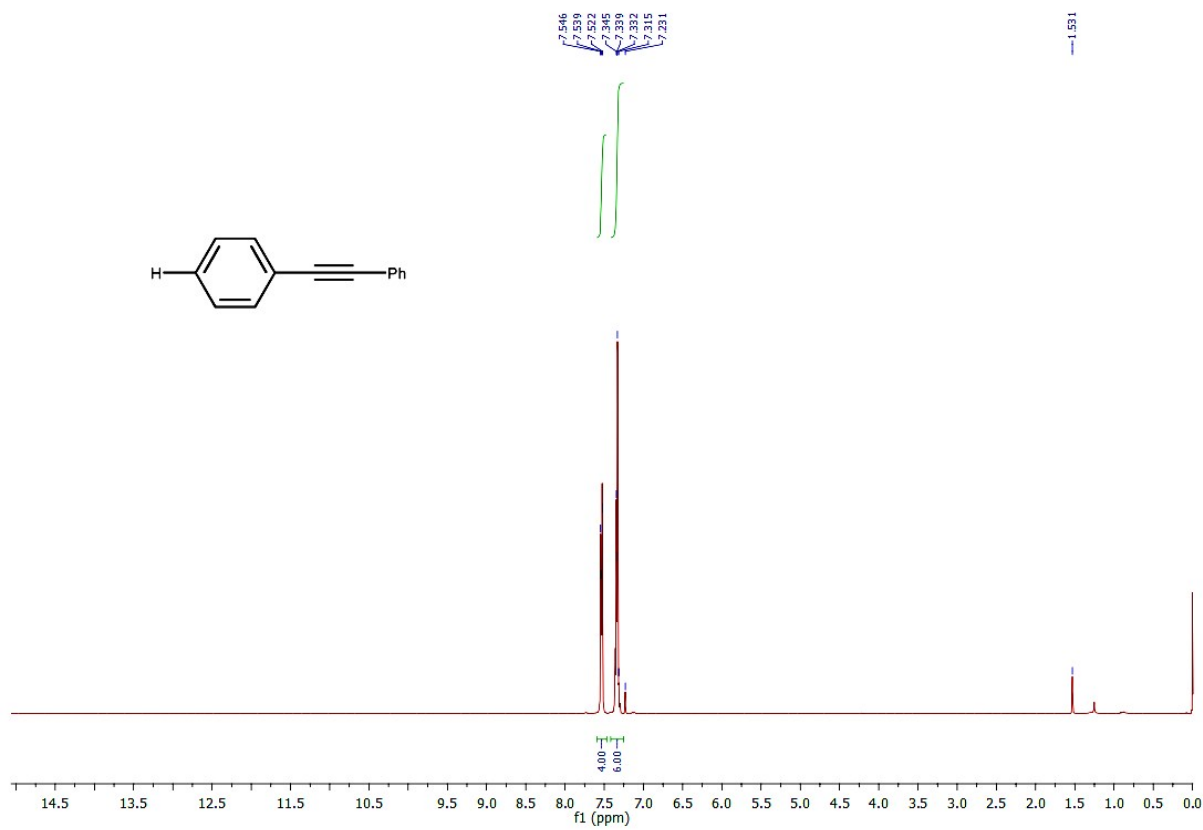

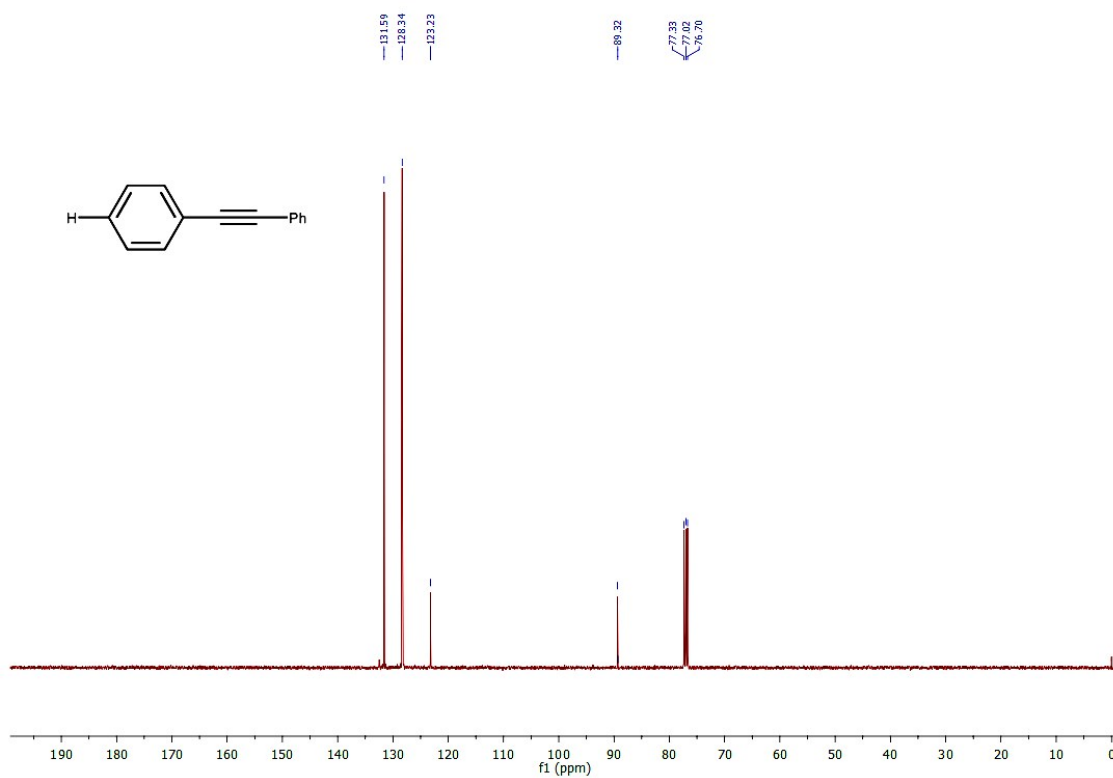

Table 3, Entry 2:

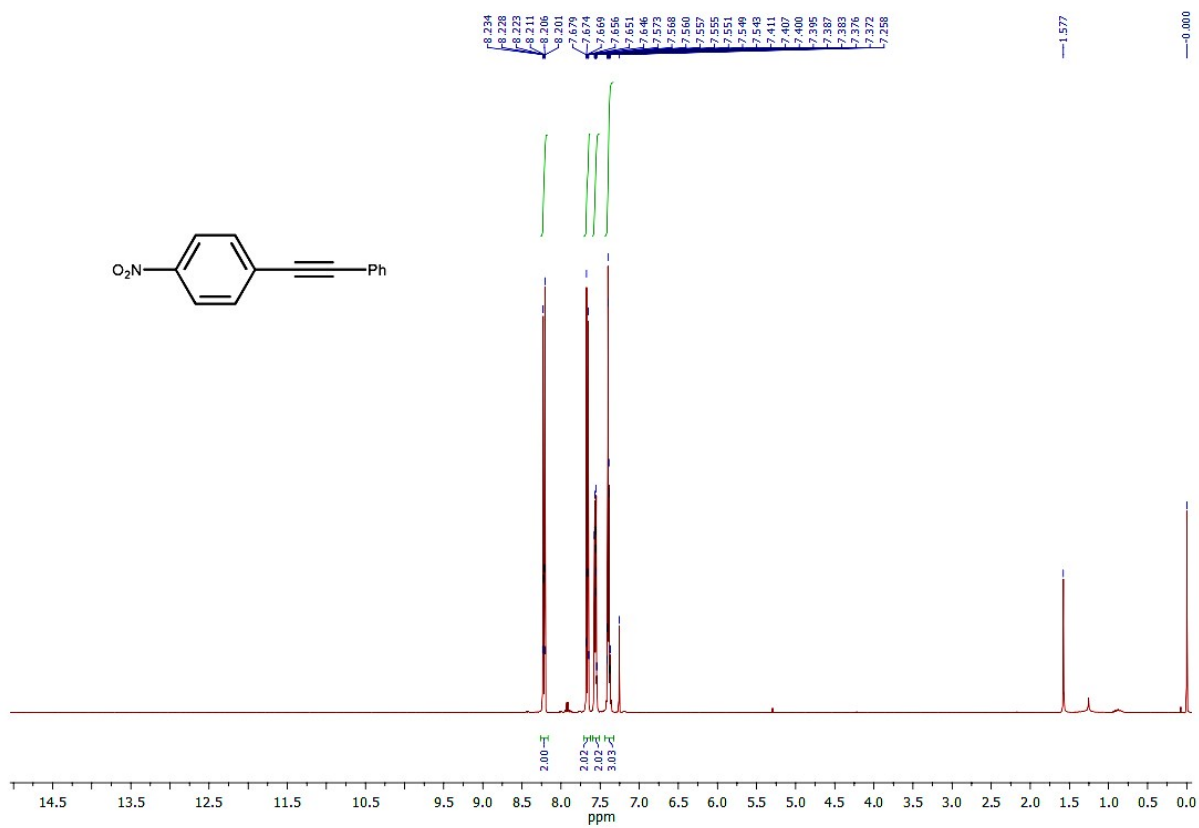

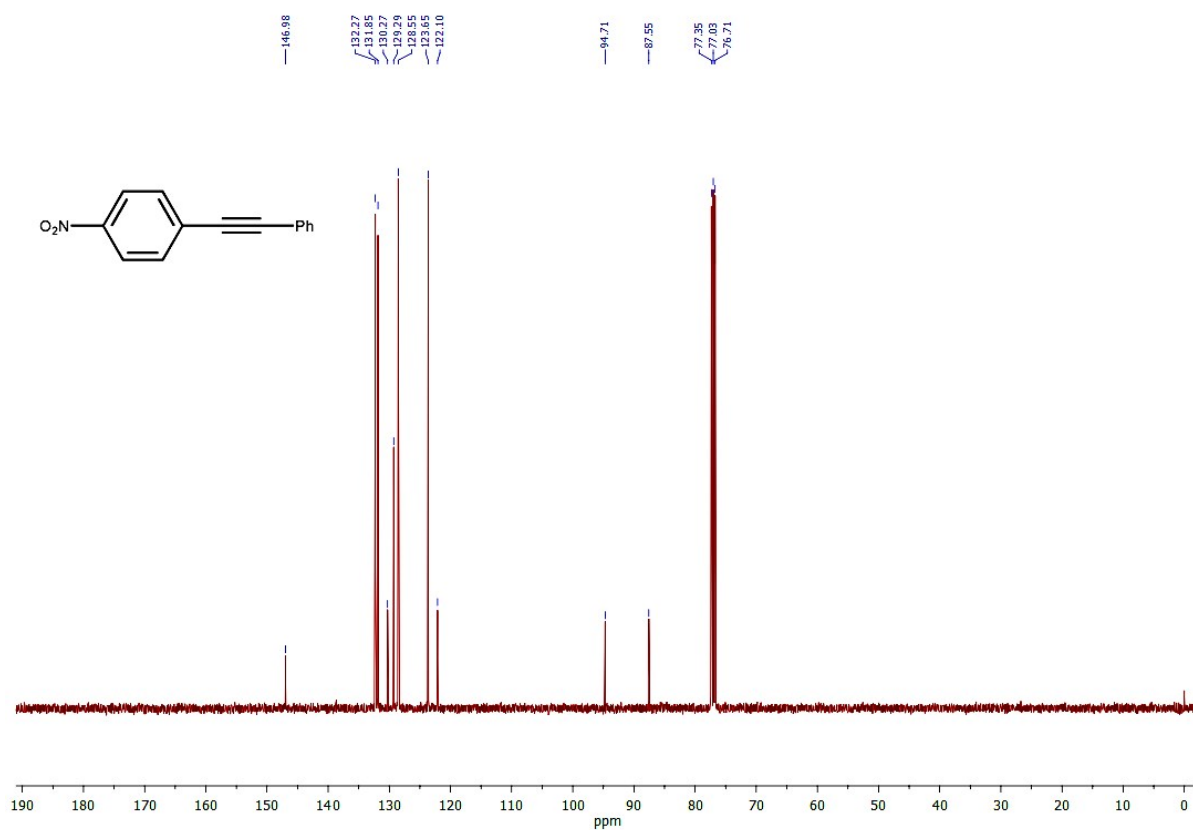

Table 3, Entry 3:

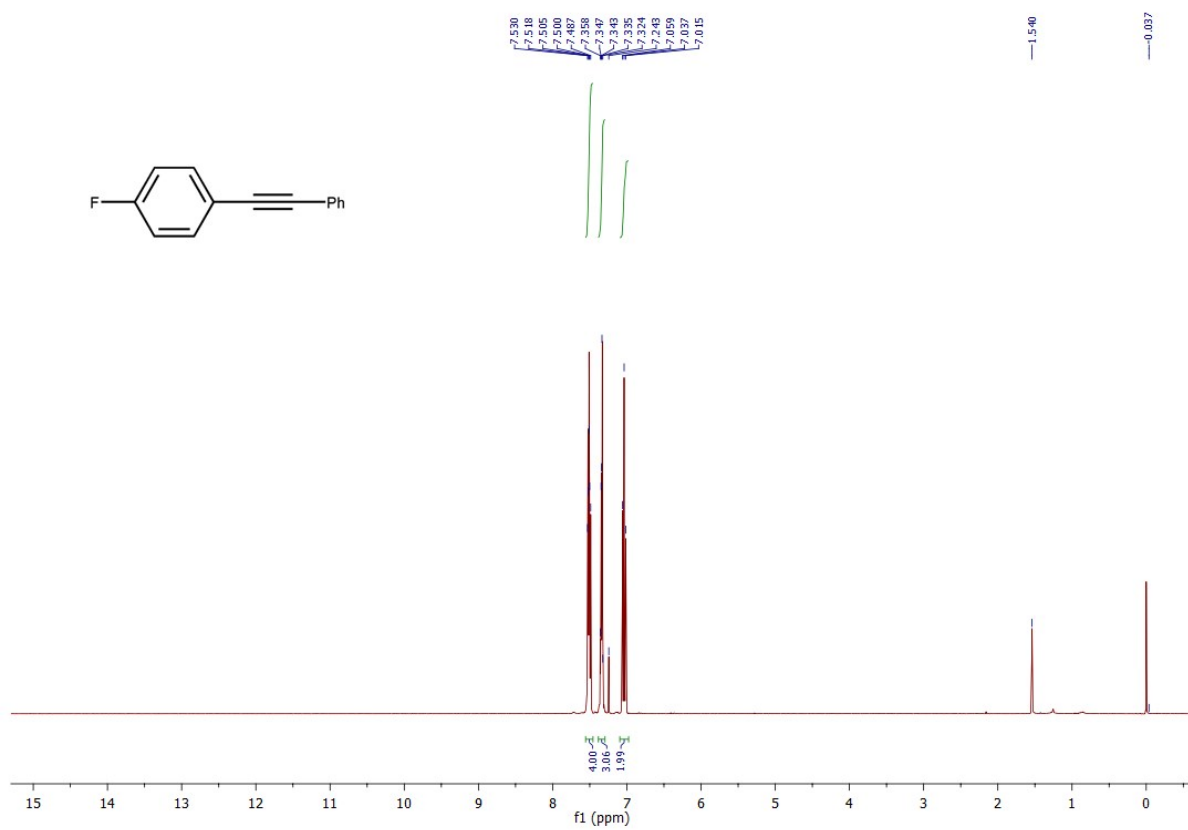



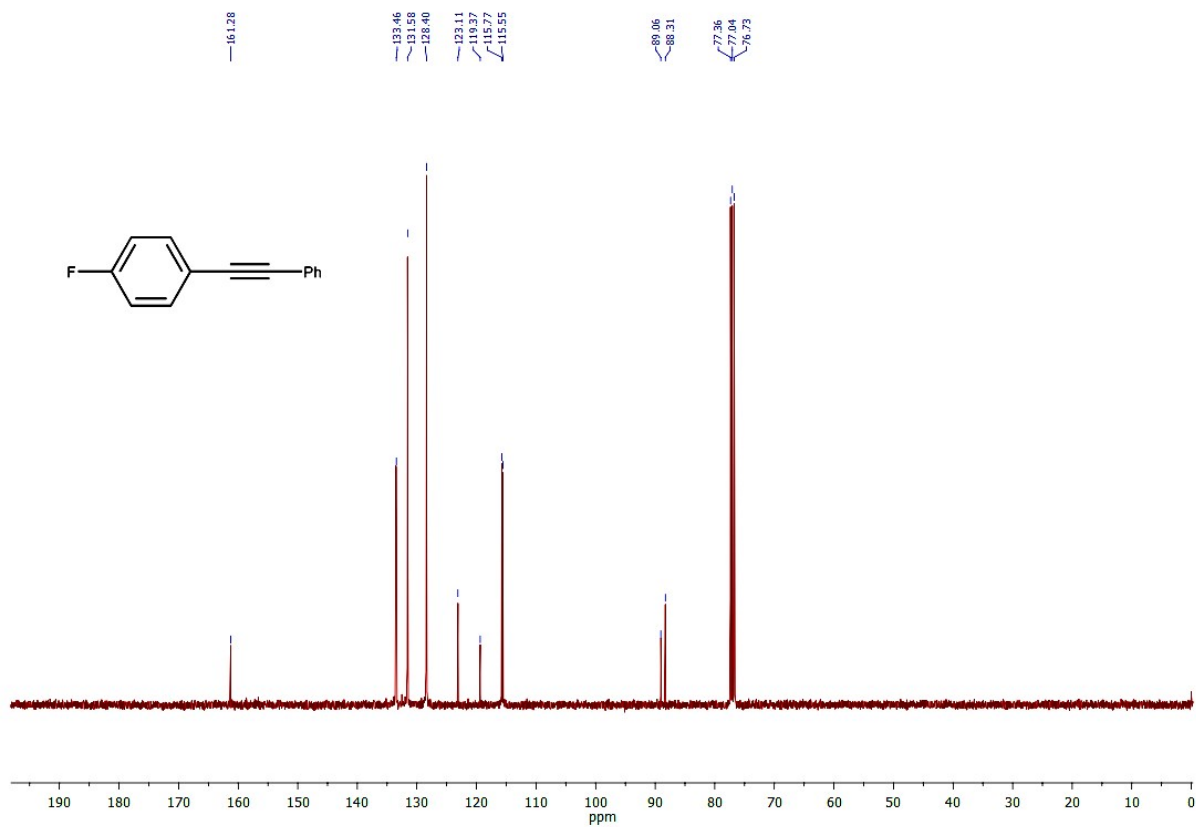

Table 3, Entry 4 and 11:

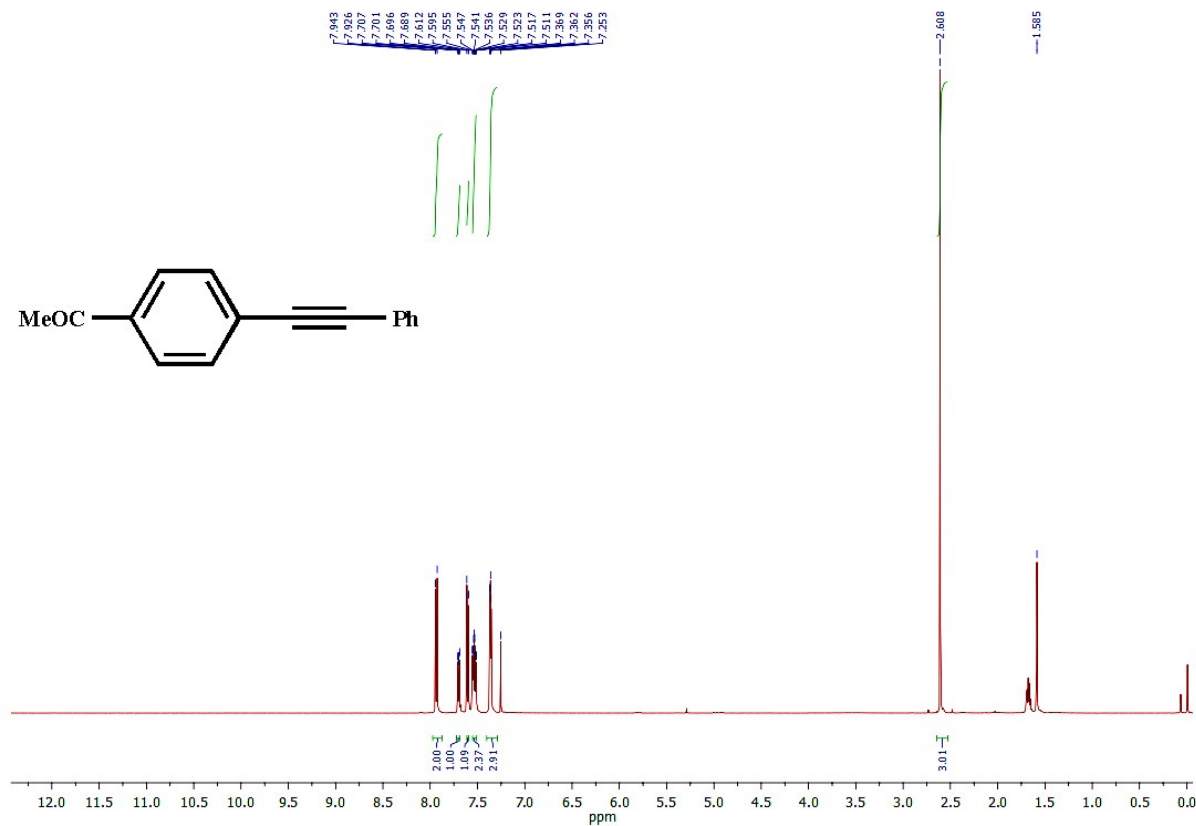

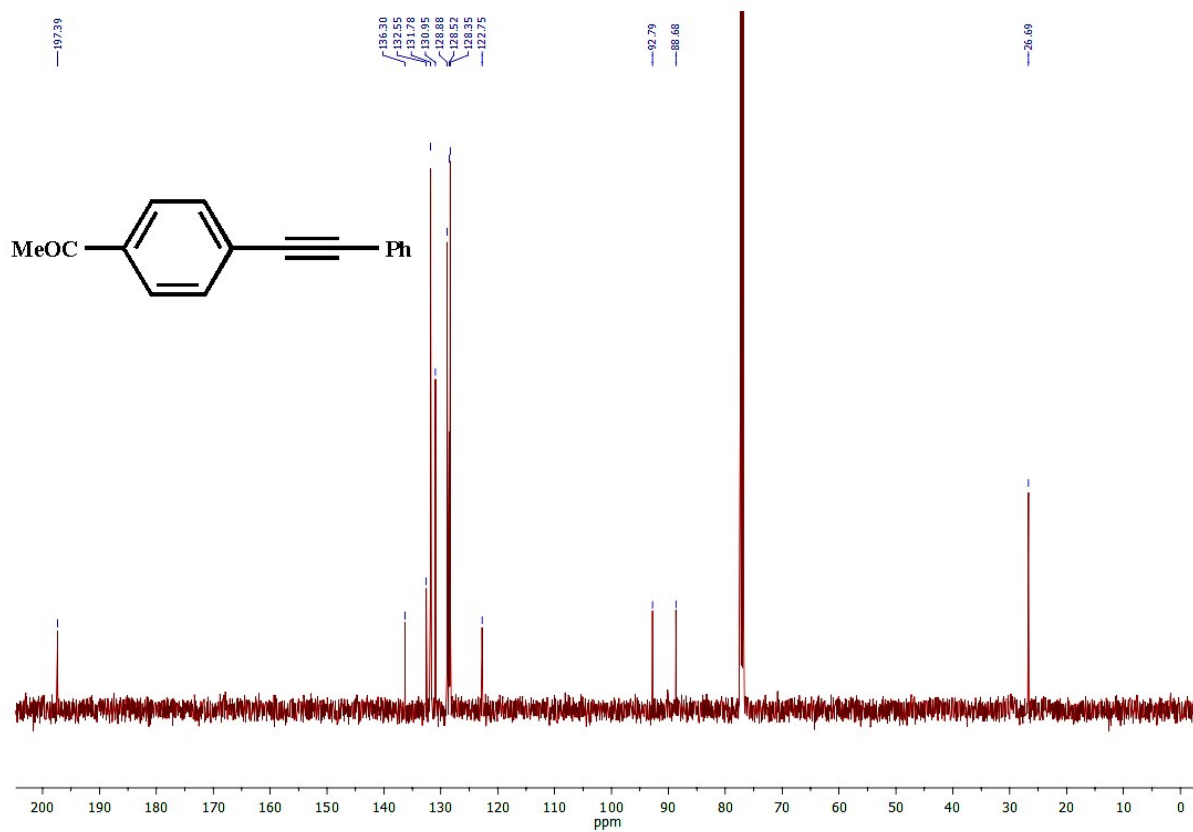

Table 3, Entry 5 and 12:

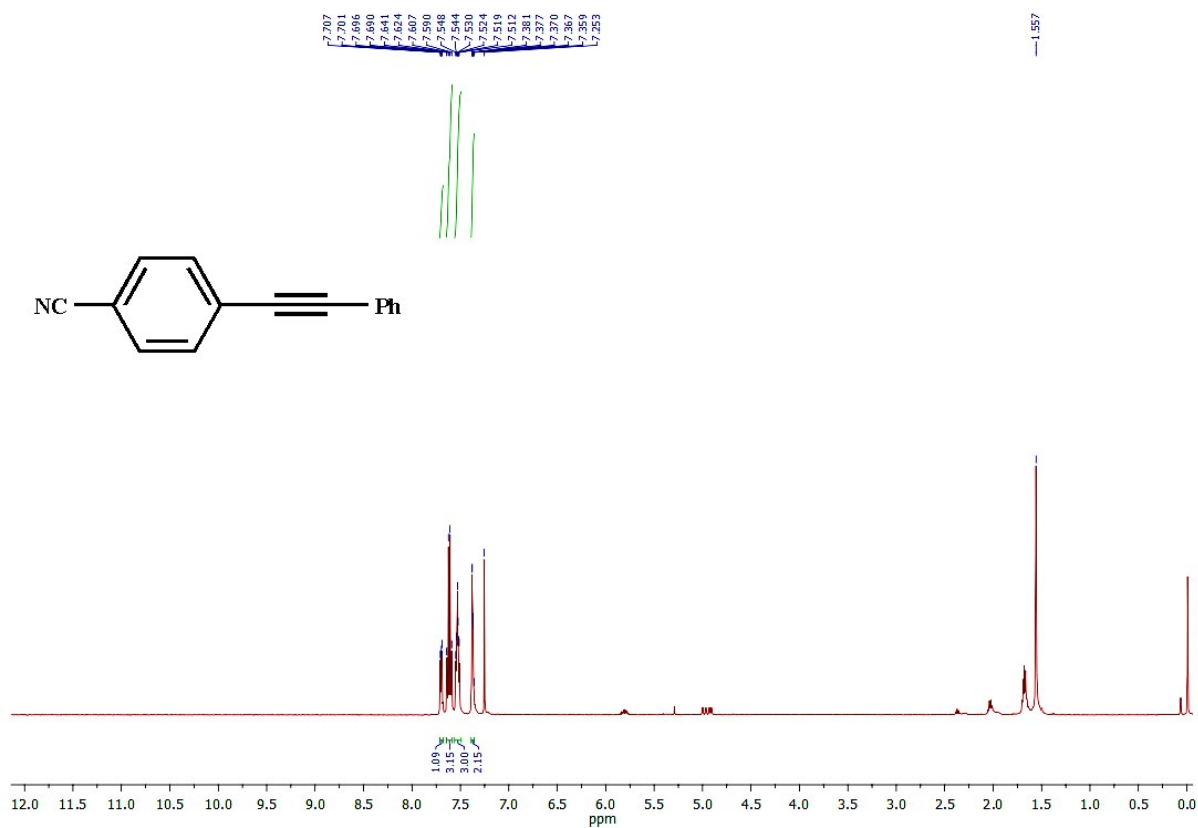

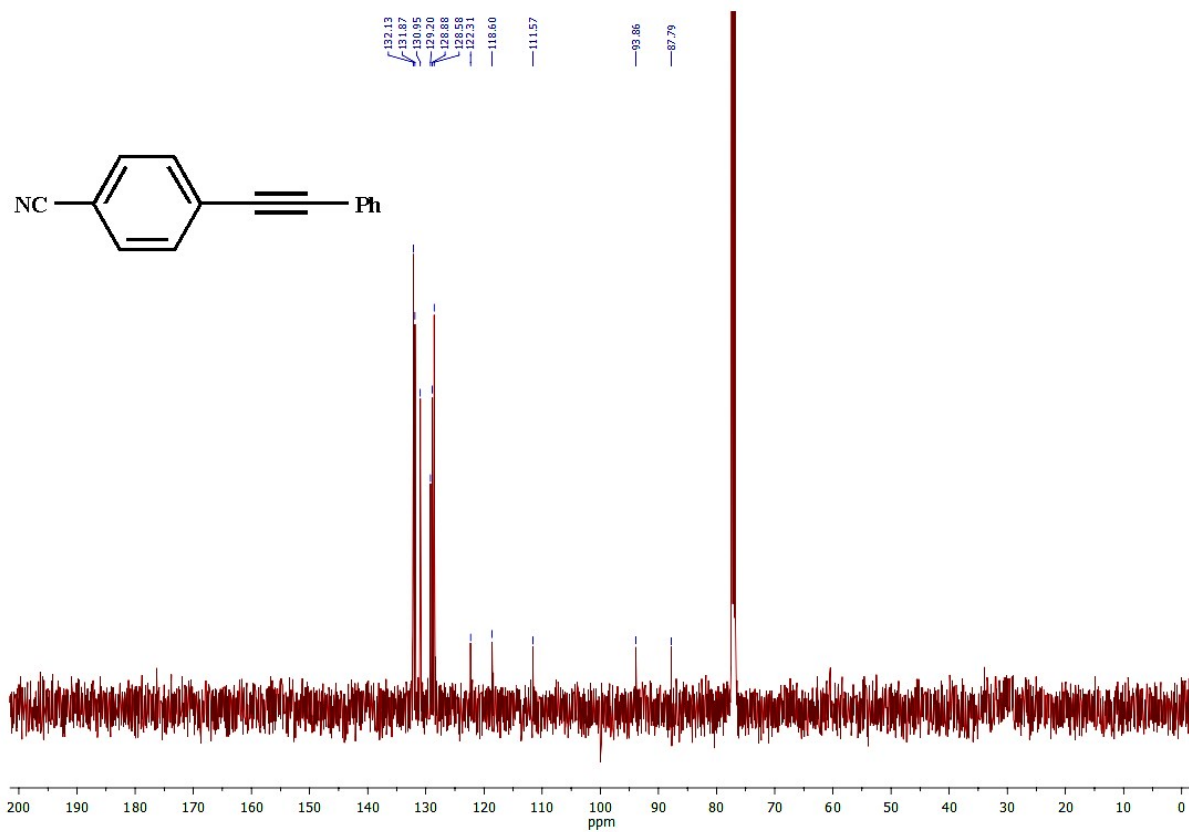

Table 3, Entry 6 and 13:

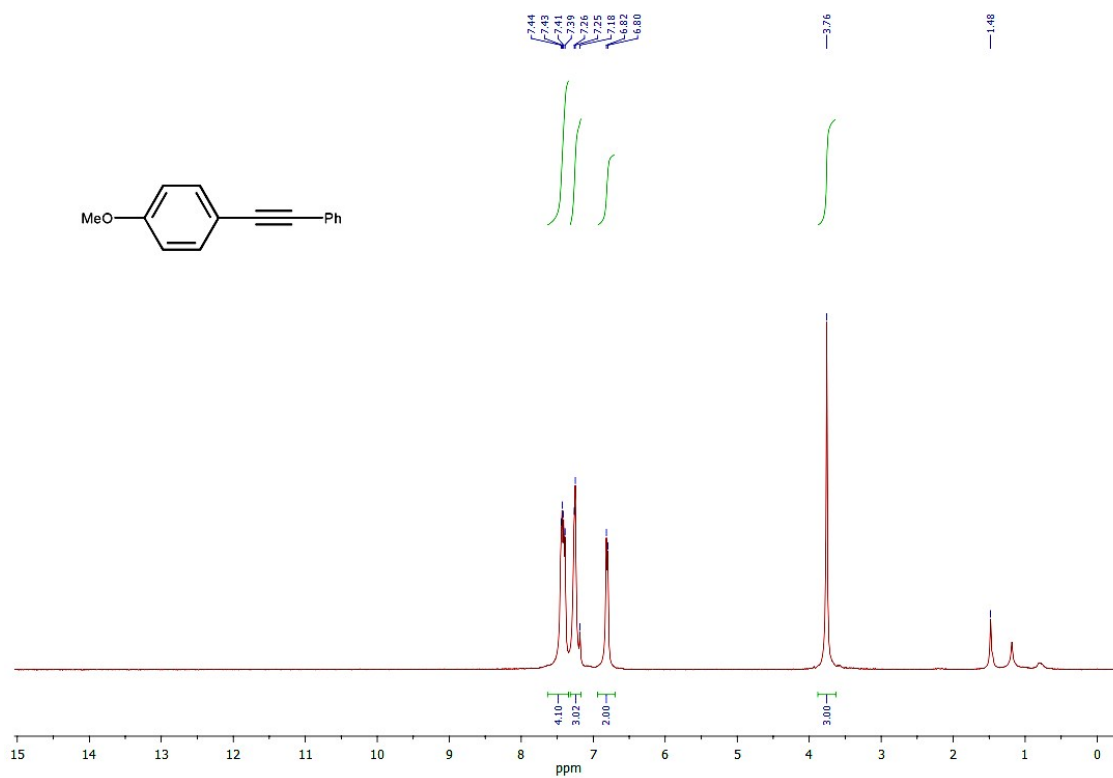

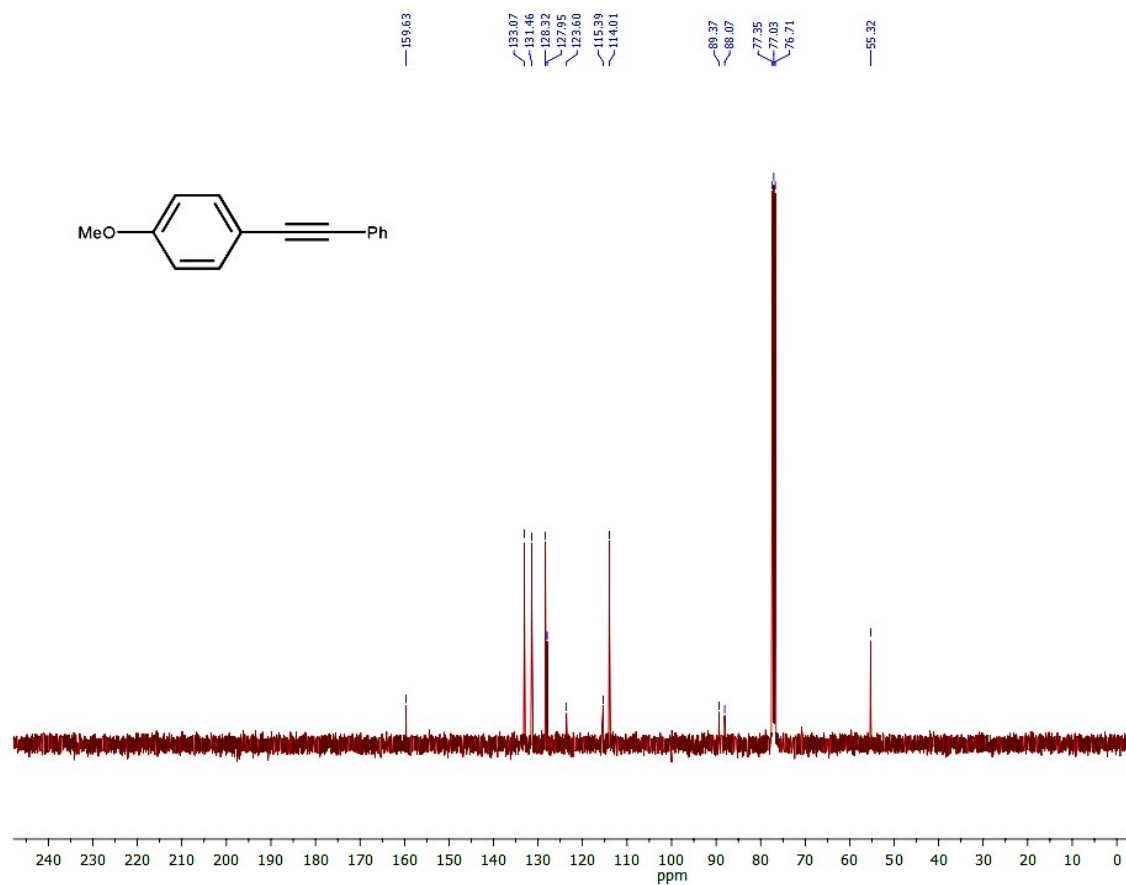

Table 3, Entry 7 and 14:

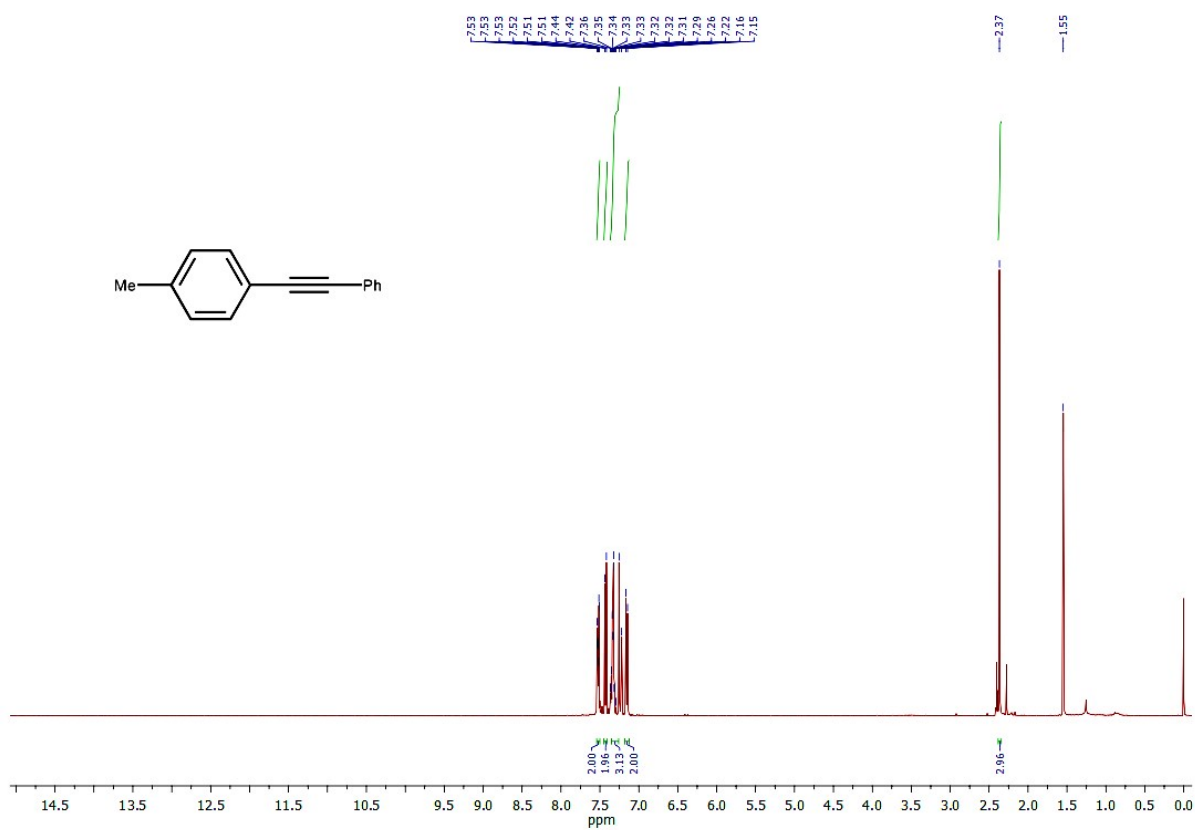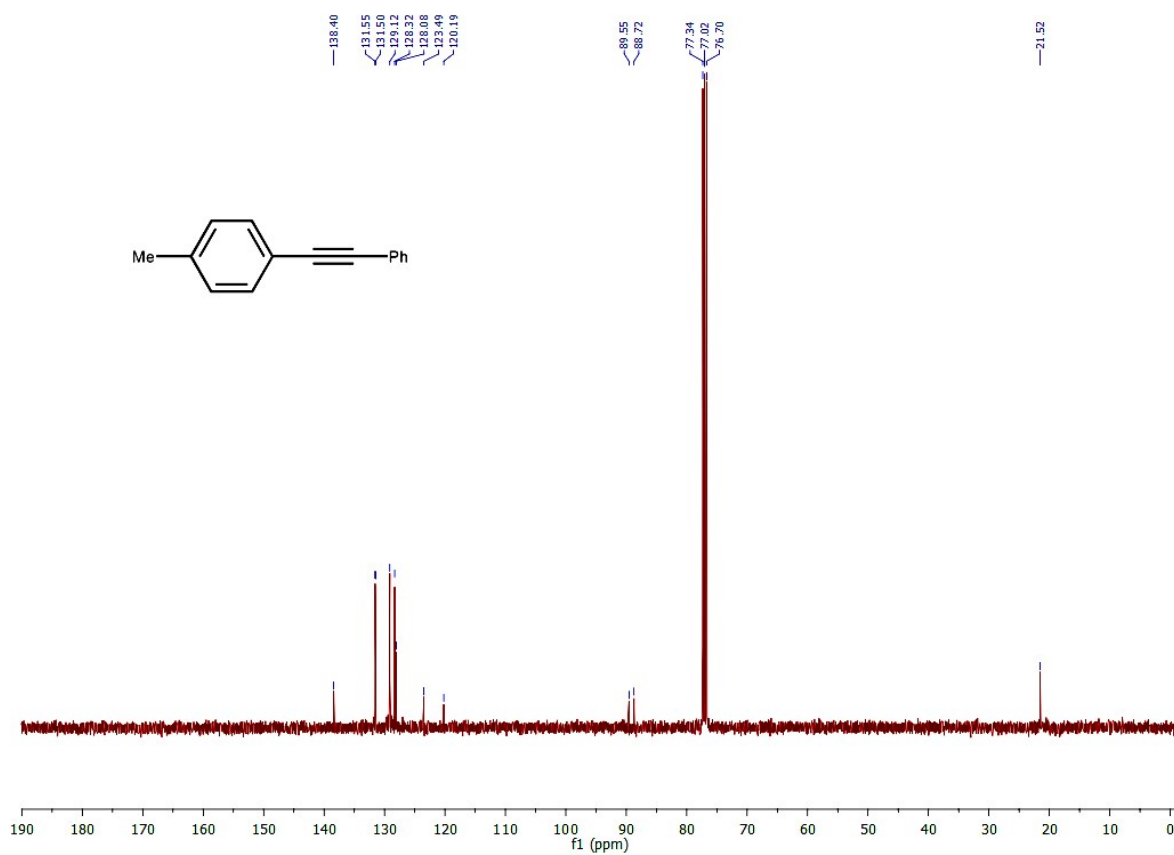

Table 3, Entry 8:

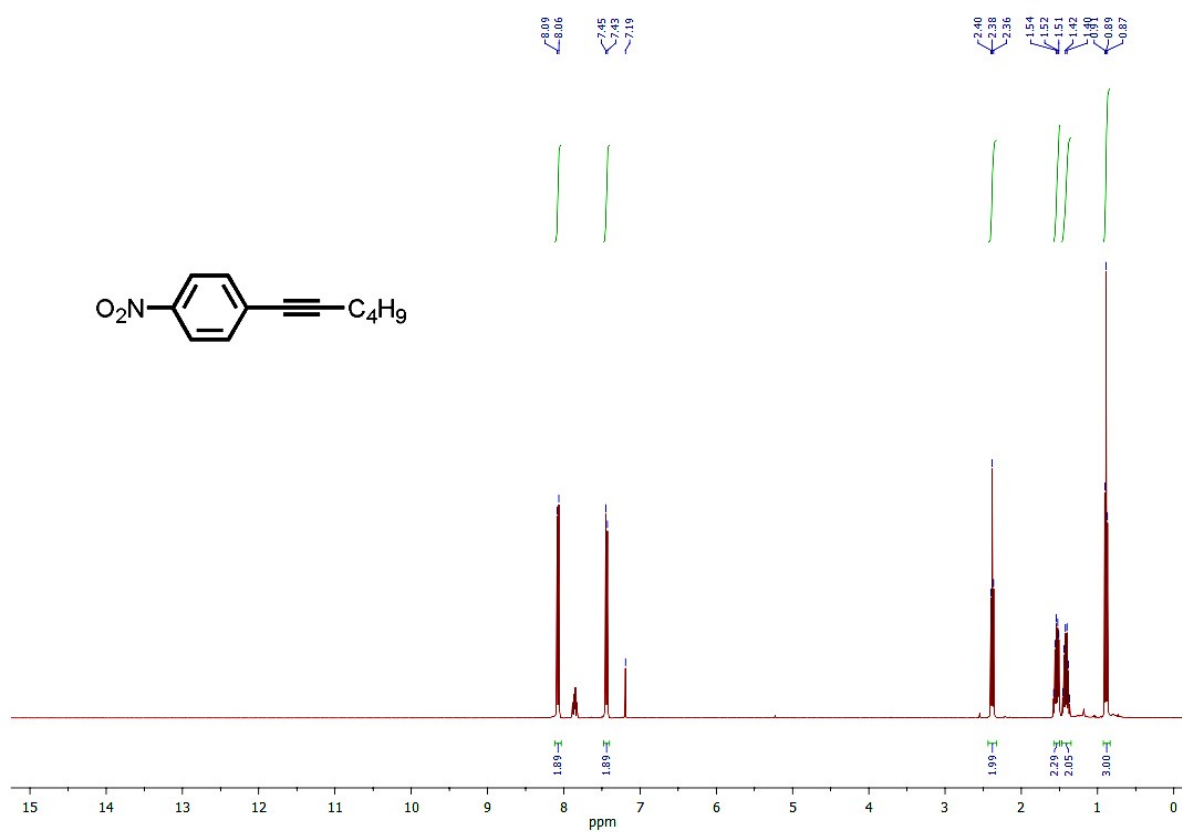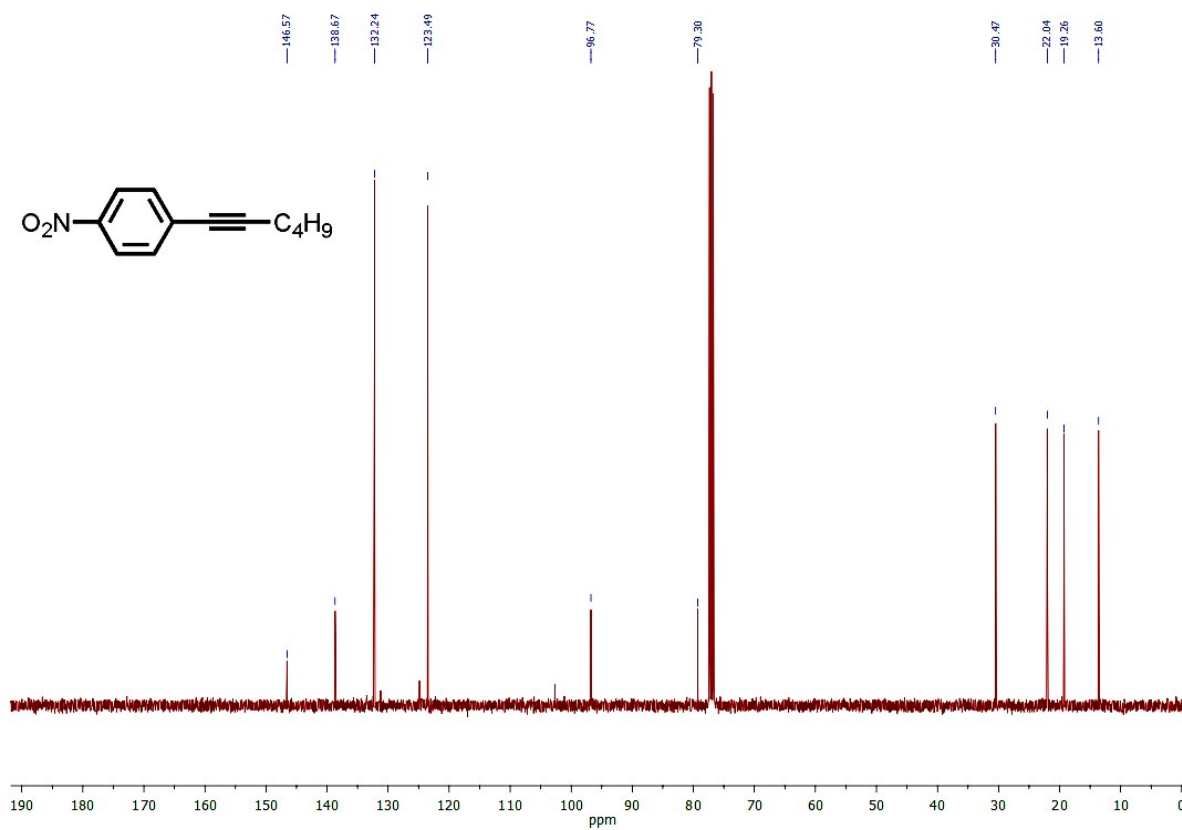

Table 3, Entry 9:

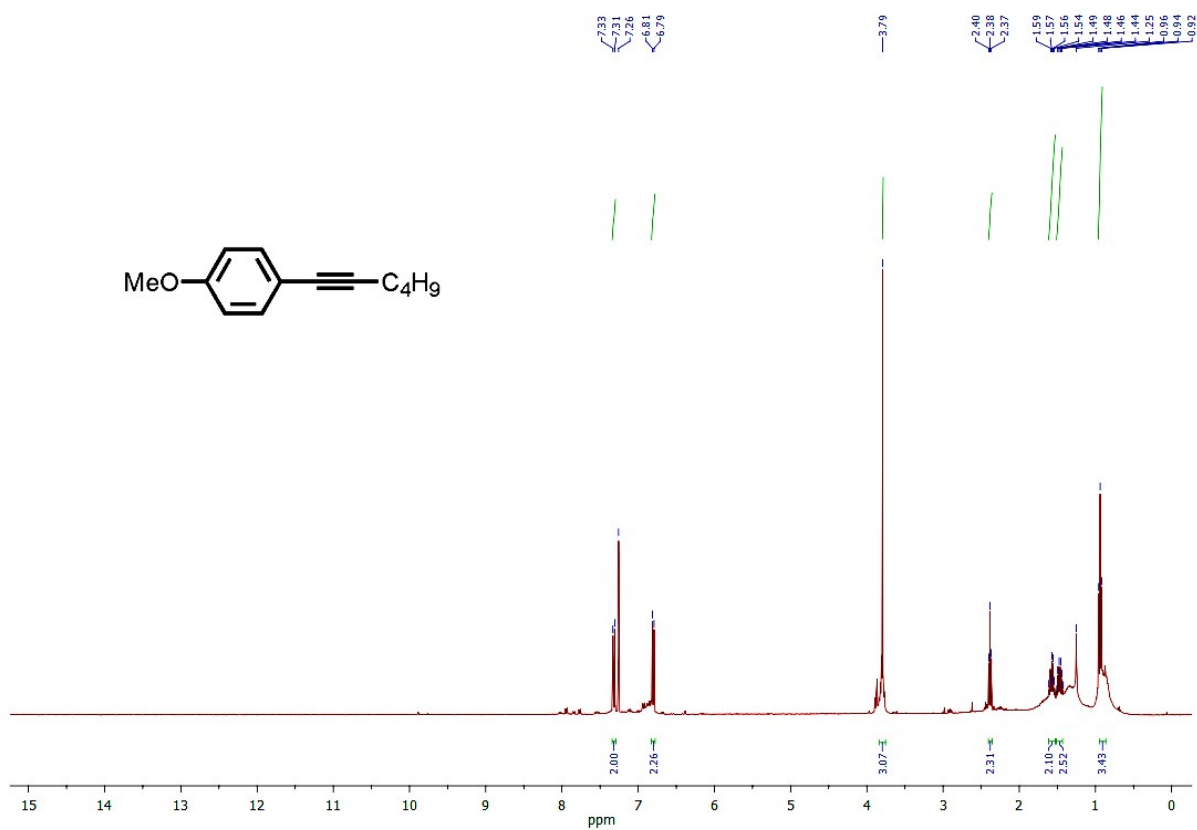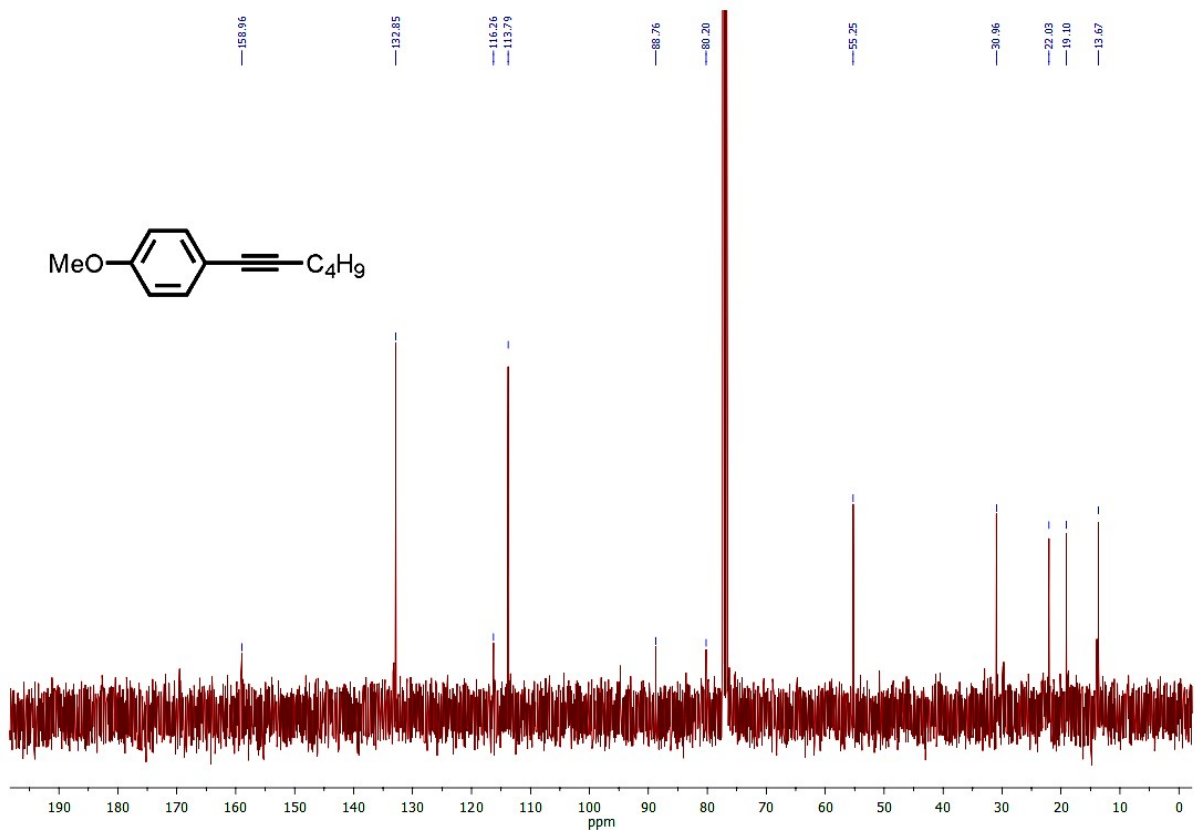

Supplement: c5nj03658e1.pdf [file c5nj03658e1.pdf]
